# Supplementary material
Source: Springer Nature journal article supplement (https://www.springermedizin.de/resource/supplementary/12889_2010_2817_MOESM1_ESM.pdf/9490028)
Supplement: MOESM1 [file 9490028]

**Pattern Matrix**

|                                                               | Component |      |      |       |      |       |      |
|---------------------------------------------------------------|-----------|------|------|-------|------|-------|------|
|                                                               | 1         | 2    | 3    | 4     | 5    | 6     | 7    |
| Work without frequent deadlines                               | ,858      |      |      |       |      |       |      |
| Work without managerial tasks                                 | ,704      |      |      |       |      |       |      |
| Work without high action tempo                                | ,676      |      |      |       |      |       |      |
| Predictable working situation                                 | ,673      |      |      |       |      |       |      |
| Cope with conflicts                                           | ,594      |      |      |       | ,402 |       |      |
| Possibilities to fall back on direct colleagues and superiors | ,566      |      |      |       |      |       |      |
| Work without constant interruptions                           | ,545      |      |      |       |      |       |      |
| Work without increased personal risk                          | ,374      |      |      |       |      |       |      |
| Fixed and familiar methods of working                         | ,318      |      |      |       |      | -,303 |      |
| Does not choose an alternative approach                       |           | ,796 |      |       |      |       |      |
| Does not realize a wrong approach                             |           | ,766 |      |       |      |       |      |
| Does not appeal to colleagues for help                        |           | ,609 |      |       |      |       |      |
| Does not decide about approach                                |           | ,568 |      |       |      |       |      |
| Does not think of alternatives                                |           | ,509 |      |       |      |       |      |
| Does not persist until the goal is reached                    |           | ,410 |      |       |      |       |      |
| No insight into one's own capacities and disabilities         |           | ,317 |      |       |      |       |      |
| Reading                                                       |           |      | ,744 |       |      |       |      |
| Writing                                                       |           |      | ,708 |       |      |       |      |
| Seeing                                                        |           |      | ,615 |       |      |       |      |
| Transportation                                                |           |      | ,449 |       |      |       |      |
| Speaking                                                      |           |      | ,411 |       |      |       |      |
| Hearing                                                       |           |      |      |       |      |       |      |
| Lacking initiative                                            |           |      |      | -,830 |      |       |      |
| Does not set targets                                          |           |      |      | -,789 |      |       |      |
| Does not start in time                                        |           |      |      | -,708 |      |       |      |
| No direct contact with colleagues required                    |           |      |      |       | ,773 |       |      |
| No direct contacts with clients                               |           |      |      |       | ,646 |       |      |
| Teamwork                                                      |           |      |      |       | ,623 |       |      |
| No direct contacts with patients/people needing help          |           |      |      |       | ,605 |       |      |
| Expressing personal feelings                                  |           |      |      |       | ,583 |       |      |
| Dealing with the emotional problems of other people           |           |      |      |       | ,479 |       |      |
| Dividing attention                                            |           |      |      |       |      | -,744 |      |
| Focusing attention / concentration                            |           |      |      |       |      | -,742 |      |
| Memory                                                        |           |      |      |       |      | -,681 |      |
| Action tempo                                                  |           |      |      |       |      | -,475 |      |
| Pre-structured tasks                                          |           |      |      |       |      | -,452 |      |
| No distractions by others                                     |           |      |      |       | ,318 | -,397 |      |
| Working under intensive coaching                              |           |      |      |       |      | -,334 |      |
| Does not act in a logical sequence                            |           |      |      |       |      |       | ,591 |
| Does not stop when the goal is achieved                       |           |      |      |       |      |       | ,591 |
| Does not check the proceedings of actions                     |           |      |      |       |      |       | ,563 |

Extraction Method: Principal Component Analysis.

Rotation Method: Oblimin with Kaiser Normalization.

KMO: 0.932; MSA > 0.687

Cumulative percentage of variance explained (seven factors): 48.7%
